# Supplementary material
Source: publisher figshare collection journal article supplement (https://geolsoc.figshare.com/ndownloader/files/28829930)
Supplement: Supplementary file 1 [file 28829930]

## Sheet: Hoja1
Sampling level	Cr (ppm)	Co (ppm)	Mo (ppm)	Ni (ppm)	U (ppm)	V (ppm)	TOC (wt.%)
CAT-9 (160 cm)	86.1473	11.6655	0.857924	50.0341	9.81936	83.9198	4.23
CAT-9 (130 cm)	95.923	11.6795	0.865096	47.7398	11.1937	84.9855	4.29
CAT-9 (100 cm)	100.009	13.2309	0.919957	47.164	11.2033	83.2952	1.54
CAT-9 (80 cm)	98.8221	7.92412	0.597158	34.5331	11.8574	111.73	0.86
CAT-9 (50 cm)	91.6527	8.52174	0.882773	40.7856	10.2514	84.2213	2.74
CAT-9 base	80.0744	7.4691	0.544847	30.937	9.24509	72.769	2.42
CAT-8 top	15.1923	0.798732	0.142966	4.25131	1.26729	9.25844	1.2
CAT-8 base	18.9572	1.88983	0.413794	10.5773	1.93851	13.7339	1
CAT-7	72.893	9.343	1.4569	34.514	8.5639	75.443	3.58
CAT-6	38.7285	3.27124	0.738327	17.2314	4.67647	23.0743	1.17
CAT-5 top	22.3087	1.94381	0.349554	6.68925	2.04905	15.2304	1.5
CAT-5 base	37.6014	3.856	1.38915	15.6392	4.81722	24.2946	0.72
CAT-4	96.104	11.5464	1.64639	34.6422	11.7842	80.5823	1.26
CAT-3	19.0928	1.52701	0.862451	12.6046	2.30018	14.2139	1.45
CAT-2 (10-15 cm)	65.3689	8.75038	4.62008	41.5597	8.84207	52.9076	2.61
CAT-2 (0-15 cm)	99.7257	6.63812	4.72203	38.9624	11.4002	79.5522	4.98
CAT-1	41.0892	2.1552	1.80405	13.4855	4.90201	22.1763	0.33
